# Supplementary material for: Solu: a cloud platform for real-time genomic pathogen surveillance
Source: PubMed Central journal article supplement (PMC11731562; doi:10.1186/s12859-024-06005-z), 2025-01-13
Supplement: 12859_2024_6005_MOESM2_ESM.pdf [file 12859_2024_6005_MOESM2_ESM.pdf]

## S2. Additional phylogenetics results

**Figure 1.** Solu's phylogram of the *S. aureus* dataset vs. reported sequence types (outer ring)

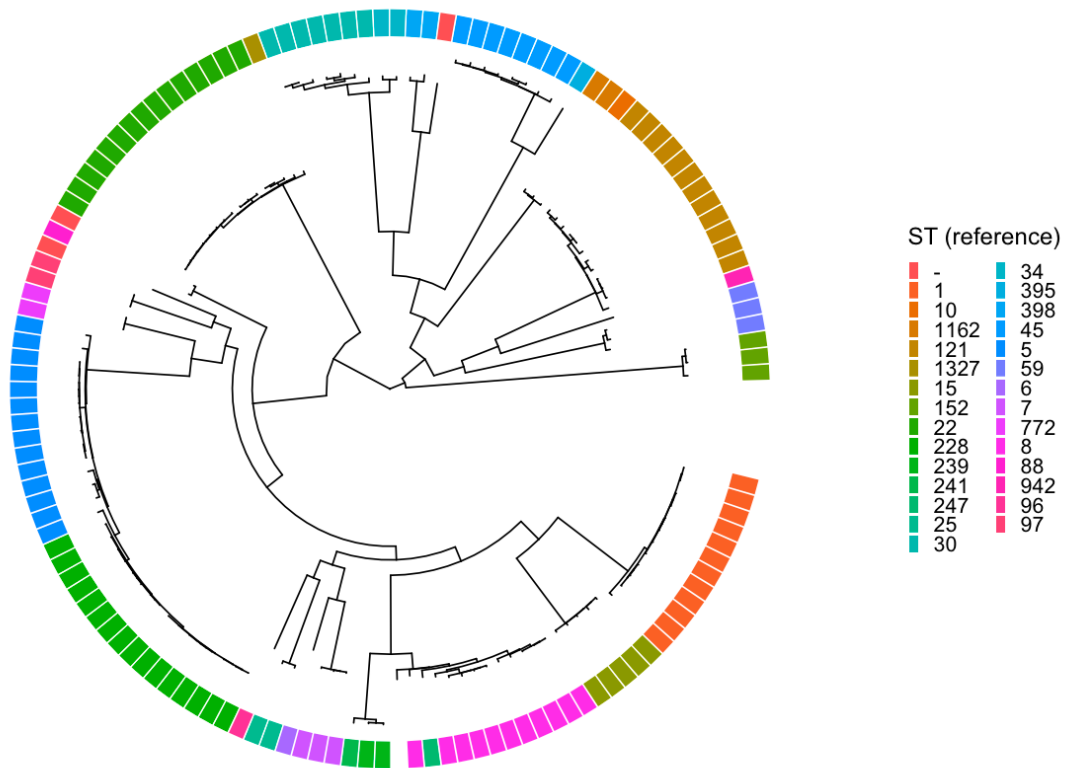

**Figure 2.** Solu’s phylogram of the *Candida auris* dataset vs. reported clade (outer ring)

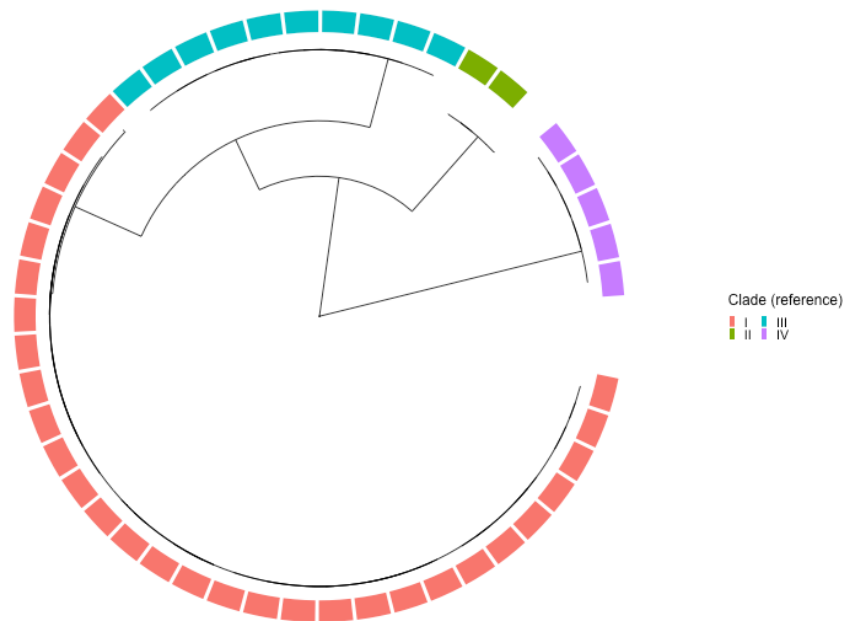

**Table 1.** Validation of Solu’s reference-based vs. reference-free phylogenetics

| Dataset           | Robinson-Foulds distance of Solu’s reference-based tree vs. Solu’s reference-free tree |
|-------------------|----------------------------------------------------------------------------------------|
| <i>S. aureus</i>  | 0.08093671                                                                             |
| <i>E. faecium</i> | 0.2694115                                                                              |

|                    |           |
|--------------------|-----------|
| <i>S. enterica</i> | 0.4644507 |
| <i>C. auris</i>    | 0.2362036 |

The tree distances were calculated with TreeDist 2.9.1 (1).

**Figure 3.** Tanglegram of *Staphylococcus aureus* reference-free (left) vs. reference-based (right) phylogenetic trees

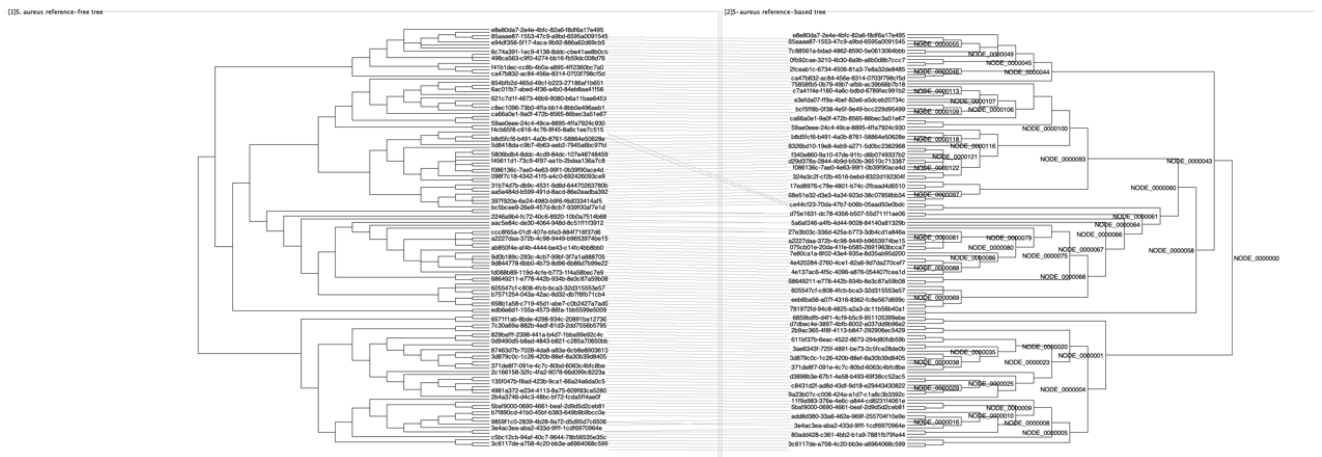

**Figure 4.** Tanglegram of *Salmonella enterica* reference-free (left) vs. reference-based (right) phylogenetic trees

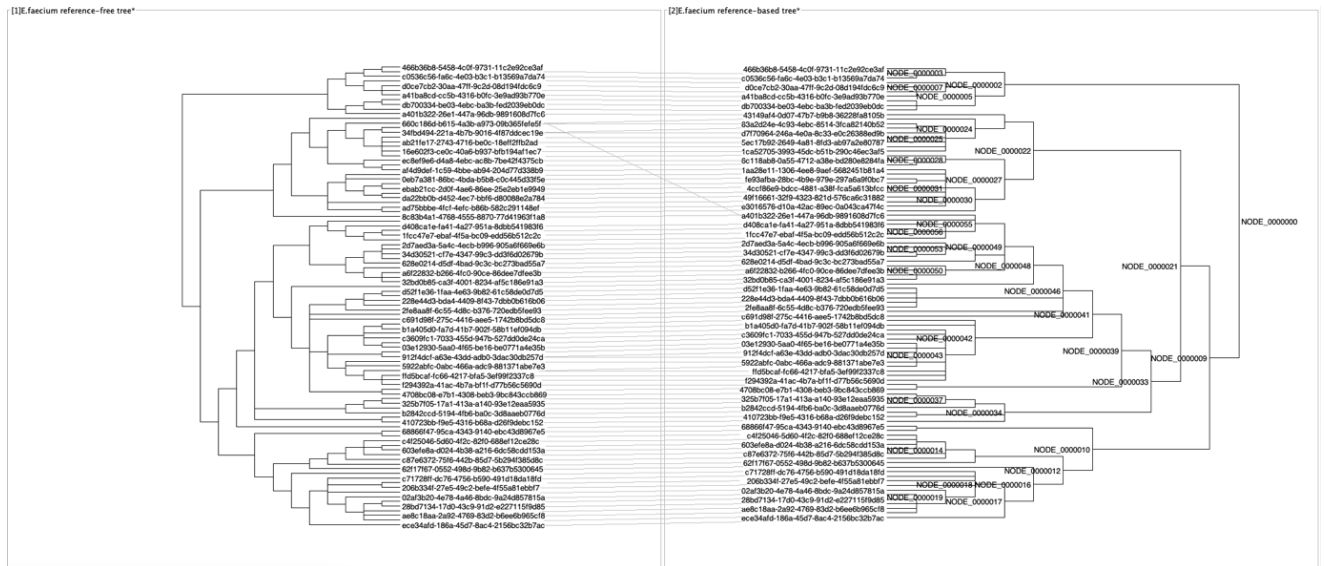

**Figure 5.** Tanglegram of *Candida auris* reference-free (left) vs. reference-based (right) phylogenetic trees

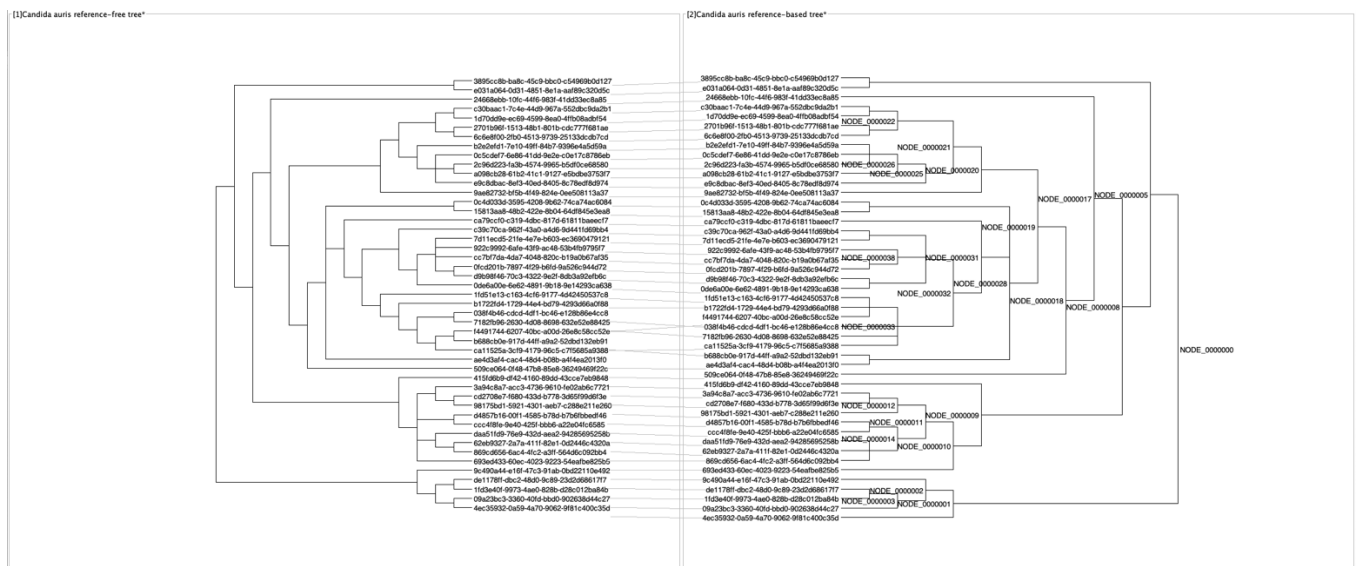

**Figure 6.** Tanglegram of *Salmonella enterica* reference-free (left) vs. reference-based (right) phylogenetic trees

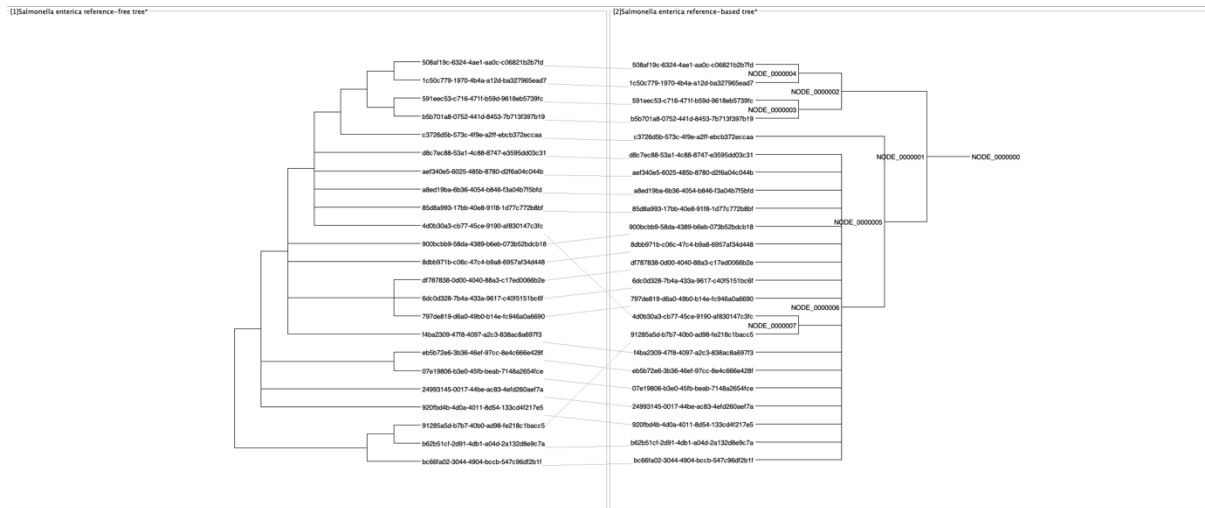

All tanglegrams were created with Dendroscope v 3.8.10 (2).

## References

1. Smith MR. Information theoretic generalized Robinson–Foulds metrics for comparing phylogenetic trees. 2020;36(20):5007–13.
2. Huson DH, Scornavacca C. Dendroscope 3: An Interactive Tool for Rooted Phylogenetic Trees and Networks. *Syst Biol.* 2012 Dec 1;61(6):1061–7.
